# Supplementary material for: Changes in Pulmonary Function Following Single-Fraction Carbon Ion Radiotherapy: A Retrospective Analysis
Source: Research Square preprint supplement (doi:10.21203/rs.3.rs-8791044/v1), 2026-02-11
Supplement: Supplementary file 1 [file 6b4b5c5a66d5bee5f227074e.docx]

Table 7. Change amount and change rate in pulmonary function for each group.

| Category | Absolute change | | | | Change rate (%) | | |
| --- | --- | --- | --- | --- | --- | --- | --- |
|  | non-IP N=87 | IP N=15 | *P*-value | non-IP N=87 | | IP N=15 | *P*-value |
| VC | -0.12  (-0.64 – 0.59) | -0.23  (-0.57 – 0.06) | 0.001 | -4.91  (-27.4 – 27.8) | | -9.22  (-21.7 – -2.29) | 0.007 |
| %VC | -4.30  (-22.2 – 28.7) | -8.10  (-17.5 – -1.60) | 0.017 | -4.61  (-27.4 – 28.7) | | -8.41  (-21.5 – -1.76) | 0.007 |
| FVC | -0.12  (-1.0 – 0.78) | -0.31  (-0.66 – 0.38) | 0.049 | -4.38  (-29.3 – 54.2) | | -9.90  (-21.7 – 13.0) | 0.032 |
| %FVC | -3.80  (-27.6 – 35.2) | -8.40  (-21.4 – 11.8) | 0.068 | -4.35  (-29.2 – 55.0) | | -9.93  (-21.6 – 13.7) | 0.036 |
| FEV1.0 | -0.10  (-0.56 – 0.36) | -0.22  (-0.64 – 0.07) | 0.011 | -7.14  (-31.9 – 30.5) | | -11.3  (-25.1 – 4.83) | 0.025 |
| %FEV1.0 | -4.45  (-18.5 – 25.5) | -7.70  (-24.6 – 4.80) | 0.044 | -6.31  (-30.8 – 46.8) | | -10.5  (-24.4 – 5.59) | 0.035 |
| FEV1.0/FVC | -0.80  (-16.4 – 18.3) | -1.40  (-13.3 – 11.6) | 0.577 | -0.88  (-32.0 – 36.5) | | -1.65  (-18.7 – 15.4) | 0.667 |
| DLCO | -0.70  (-9.34 – 8.26) | -1.06  (-8.07 – 1.25) | 0.178 | -5.45  (-48.1 – 86.9) | | -11.5  (-59.5 – 30.9) | 0.068 |
| %DLCO | -4.20  (-72.5 – 57.1) | -6.60  (-44.6 – 13.9) | 0.275 | -4.51  (-49.0 – 87.9) | | -9.93  (-57.7 – 43.9) | 0.083 |

Continuous variables are expressed as median with range

IP, interstitial pneumonia; VC, vital capacity; %VC, percent predicted VC; FVC, forced vital capacity; %FVC, percent predicted FVC; FEV1.0, forced expiratory volume in 1 second; %FEV1.0, percent predicted FEV1.0; DLCO, diffusing capacity of the lung for carbon monoxide; %DLCO, percent predicted DLCO
