# Supplementary material for: Changes in Pulmonary Function Following Single-Fraction Carbon Ion Radiotherapy: A Retrospective Analysis
Source: Research Square preprint supplement (doi:10.21203/rs.3.rs-8791044/v1), 2026-02-11
Supplement: Supplementary file 2 [file e982f338f1452bccfeb521bf.docx]

Table 6. Changes in pre- and post-CIRT pulmonary function foe each group.

| Category | non-IP N=87 | | | | IP N=15 | | |
| --- | --- | --- | --- | --- | --- | --- | --- |
|  | pre-CIRT | post-CIRT | *P*-value | pre-CIRT | | post-CIRT | *P*-value |
| VC (L) | 2.65  (1.32–4.42) | 2.56  (1.05–4.18) | <0.001 | 2.74  (1.45 – 3.86) | | 2.52  (1.38 – 3.75) | <0.001 |
| %VC (%) | 98.1  (49.7–145) | 95.6  (46.1–139) | <0.001 | 90.6  (65.0 – 131) | | 82.1  (51.6 – 128) | <0.001 |
| FVC (L) | 2.50  (1.09 – 4.38) | 2.36  (1.00 – 4.28) | <0.001 | 2.70  (1.40 – 3.41) | | 2.35  (1.41 – 3.30) | 0.007 |
| %FVC (%) | 85.5  (47.3 – 133) | 82.8  (43.6 – 123) | <0.001 | 81.8  (58.6 – 110) | | 74.1  (49.3 – 105) | 0.008 |
| FEV1.0 (L) | 1.78  (0.59 – 3.52) | 1.68  (0.61 – 3.46) | <0.001 | 1.92  (1.22 – 2.78) | | 1.78  (1.03 – 2.38) | <0.001 |
| %FEV1.0 (%) | 84.0  (31.1 – 122) | 79.9  (28.0 – 123) | <0.001 | 79.5  (56.4 – 108) | | 73.7  (48.3 – 97.1) | <0.001 |
| FEV1.0/FVC (%) | 74.2  (31.9 – 92.0) | 72.5  (29.4 – 96.5) | 0.276 | 77.4  (65.1 – 90.0) | | 75.1  (57.9 – 92.3) | 0.330 |
| DLCO  (mL/min/mmHg) | 12.2  (1.58 – 28.7) | 11.6  (1.97 – 26.9) | 0.019 | 8.47  (3.39 – 16.2) | | 6.74  (3.35 – 12.5) | 0.002 |
| %DLCO (%) | 85.0  (16.0 – 227) | 81.7  (20.2 – 193) | 0.028 | 53.4  (28.7 – 95.9) | | 45.6  (25.2 – 87.9) | 0.004 |

Continuous variables are expressed as median with range

CIRT, carbon-ion radiotherapy; IP, interstitial pneumonia; VC, vital capacity; %VC, percent predicted VC; FVC, forced vital capacity; %FVC, percent predicted FVC; FEV1.0, forced expiratory volume in 1 second; %FEV1.0, percent predicted FEV1.0; DLCO, diffusing capacity of the lung for carbon monoxide; %DLCO, percent predicted DLCO
